# Supplementary material
Source: Elsevier journal article supplement (https://www.sciencedirect.com/science/article/pii/S0009739X20300634)
Supplement: mmc1 [file S0009739X20300634:mmc1.docx]

| **ANEXO 1.**  **ENCUESTA** |  |  |
| --- | --- | --- |
| **Datos epidemiológicos** | **Datos centro trabajo habitual** | **Conocimiento guías y otros** |
| Comunidad autónoma de trabajo | Nº camas hospital de trabajo | ¿Ha leído las guías oficiales? |
| Edad | Nº obstrucciones colon último año | ¿ Le parecería interesante conocer el resultado de esta encuesta? |
| Sexo | Nº Stent colon indicados último año |  |
| Especialidad médica | Porcentaje de Stent indicados como puente a cirugía |  |
| Años de experiencia | Porcentaje de Stent Paliativos indicados |  |
|  | ¿ Necesita derivar fuera de su hospital para colocar el stent? |  |
|  | ¿ Qué especialidad coloca el stent de colon ? |  |
|  | Tiempo de espera desde SCC hasta cirugía |  |

Anexo 2. CASOS CLÍNICOS

Caso clínico 1 . Paciente joven sin comorbilidades, con neoplasia oclusiva de colon sin hallazgos de extensión en el TAC de abdomen

Caso clínico 2. Paciente anciano, sin comorbilidades, con neoplasia oclusiva de colon sin hallazgos de extensión en el TAC de abdomen

Caso clínico 3. Paciente anciano sin comorbilidades, con neoplasia oclusiva de recto , a 6 cm de margen anal, sin hallazgos de extensión en el TAC de abdomen

Caso clínico 4. Paciente mediana edad sin comorbilidades con neoplasia oclusiva en colon ascendente, sin hallazgos de extensión en el TAC de abdomen

Caso clínico 5. Paciente de 80 años sin comorbilidades, con neoplasia oclusiva en sigma, dolor en FID, y hallazgo de diástasis de ciego en TAC abdominal, no enfermedad a distancia

Caso clínico 6. Paciente de 50 años , sin comorbilidades, con neoplasia oclusiva en sigma y hallazgo de carcinomatosos en TAC abdominal

Caso clínico 7. Paciente en tratamiento QT por estadio IV de neoplasia de sigma que presenta clínica de oclusión secundaria a su neoplasia de colon
